# Supplementary material for: Consecutive entosis stages in human substrate-dependent cultured cells
Source: PubMed Central journal article supplement (PMC5624876; doi:10.1038/s41598-017-12867-6), 2017-10-02
Supplement: 41598_2017_12867_MOESM1_ESM.pdf [file 41598_2017_12867_MOESM1_ESM.pdf]

## **Consecutive entosis stages in human substrate-dependent cultured cells**

**Authors:** Anastasiia S. Garanina<sup>1</sup>, Olga P. Kisurina-Evgenieva<sup>1</sup>, Maria V. Erokhina<sup>1</sup>, Elena A. Smirnova<sup>1</sup>, Valentina M. Factor<sup>2</sup> & Galina E. Onishchenko<sup>1\*</sup>

**Authors affiliations:** <sup>1</sup>Department of Cell Biology and Histology, Faculty of Biology, Lomonosov Moscow State University, Russia. <sup>2</sup>Laboratory of Molecular Pharmacology, Center for Cancer Research, National Cancer Institute, National Institutes of Health, Bethesda, MD, USA.

**Correspondence:** GE Onishchenko, 119234, Leninskiye Gory, Moscow, Russia. Tel. +7 (495) 939-45-67. E-mail: [galina22@mail.ru](mailto:galina22@mail.ru)

**Supplementary materials includes:**

- 1. Supplementary figures**
- 2. Supplementary figure legends**



Supplementary Fig. S2.

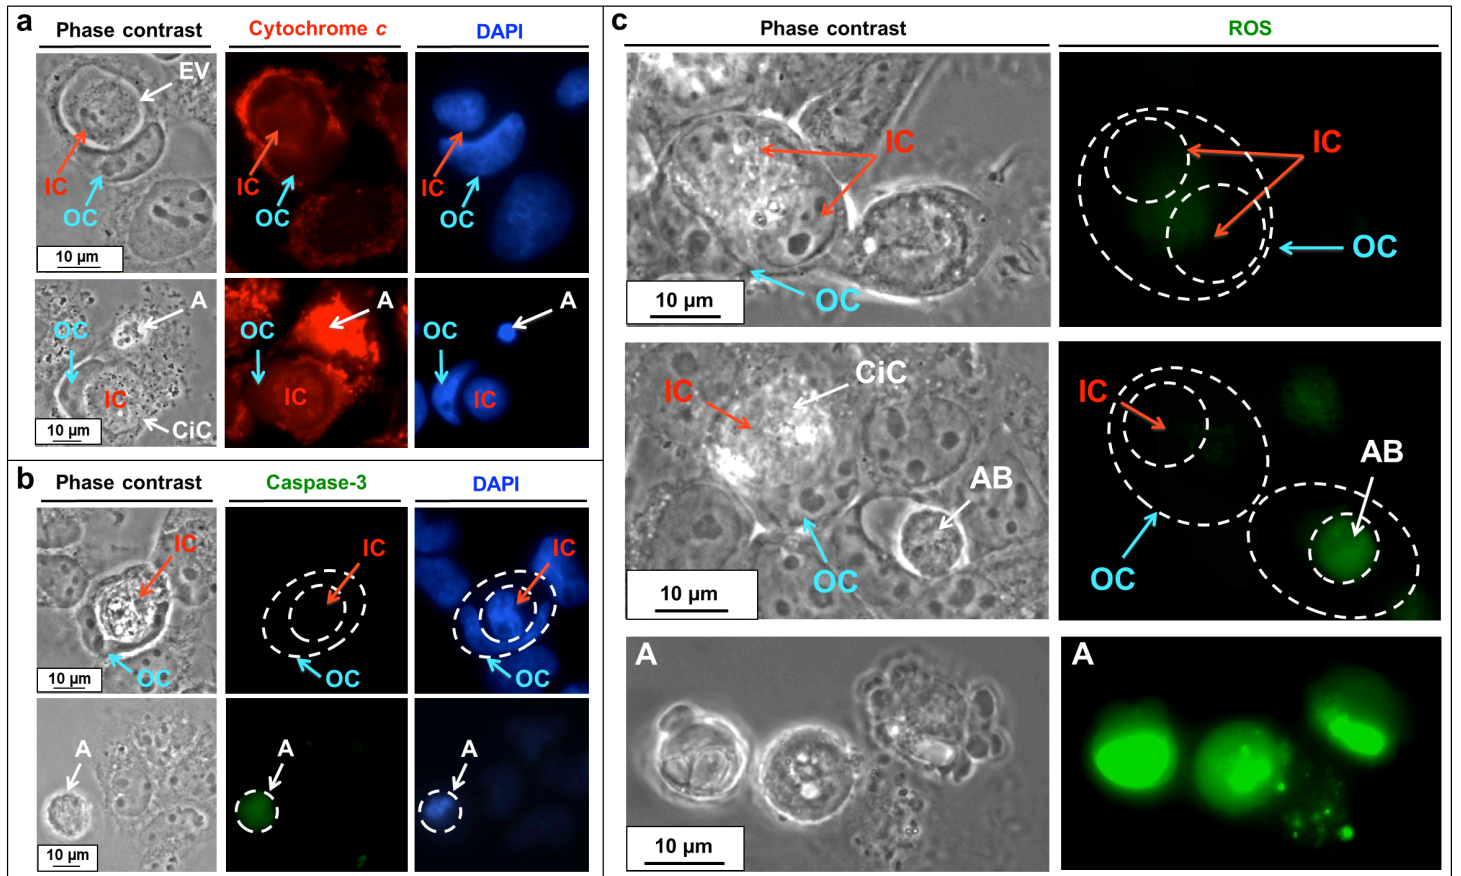

**Supplementary Fig. S1.** Changes in lysosome and mitochondrion compartments during entosis in A431 cell monolayer. **(a)** Localization of the acid vesicular compartment in the inner (IC) and outer (OC) cells at different entosis stages. Shown are representative phase-contrast and the corresponding fluorescence micrographs of entotic cells stained with acridine orange (orange). **(b)** Phase-contrast (left) and vital fluorescence (right) micrographs of IC and OC mitochondria at stages I, III and IV. A gradual decline of IC mitochondrial activity during entosis and redistribution of OC mitochondria are shown. Cells are stained with rhodamine 123. Red arrows, the mitochondria of the ICs; blue arrows, the mitochondria of the entotic cells. **(c)** Transmission electron micrograph of mitochondria in OC and IC (stage II). Panels 1 and 2 on the right are the magnified views of the boxed areas outlined in blue (1) and red (2). Morphological changes of IC mitochondria are shown. EV, entotic vacuole; Mit, mitochondrion; N, nucleus.

**Supplementary Fig. S2.** Entosis is different from apoptosis. **(a)** Representative phase-contrast (left) and fluorescence micrographs of entotic and apoptotic cells stained with anti-cytochrome *c* antibodies (middle) and DAPI (right). Note, that during entosis, there is no release of cytochrome *c* from inner cell (IC) mitochondria (top) characteristic for apoptosis (bottom). **(b)** Representative phase-contrast and fluorescent micrographs of entotic (top) and apoptotic (bottom) cells stained with anti-caspase-3 antibodies (middle) and DAPI (right). Caspase-3 is not activated during entosis (top) as compared to apoptosis (bottom). **(c)** Representative phase-contrast and fluorescence micrographs of entotic and apoptotic cells (A, bottom) stained with DCFH-DA, a marker of ROS (reactive oxygen species) accumulation. Increased ROS staining is found only in apoptotic body (AB) and apoptotic cells (A, bottom). A, apoptotic cells; AB, apoptotic body; CiC, cell-in-cell structure; EV, entotic vacuole; OC, outer cell; IC, inner cell.
